# Supplementary material for: Hepatectomy versus Chemotherapy for Resectable Colorectal Liver Metastases in Progression after Perioperative Chemotherapy: Expanding the Boundaries of the Curative Intent
Source: MDPI journal article supplement (doi:10.3390/cancers15030783), 2023-01-27
Supplement: s1 [file s1]

# SUPPLEMENTARY MATERIALS.

Supplementary table 1. Surgical data about patients submitted to hepatectomy after progression-disease.

|                                | HEP               |
|--------------------------------|-------------------|
|                                | 27                |
| Timing of surgery (%)          |                   |
| Synchronous liver and colon    | 2 ( 7.4)          |
| Liver first                    | 3 ( 11.1)         |
| Colon first                    | 20 ( 74.1)        |
| N. cut surfaces (median [IQR]) | 2.00 [1.00, 2.00] |
| Clavien-Dindo (%)              |                   |
| 0                              | 16 ( 59.3)        |
| 2                              | 7 ( 25.9)         |
| 3                              | 2 ( 7.4)          |
| 4                              | 1 ( 3.7)          |
